# Supplementary material
Source: HighWire-hosted journal article supplement (https://informatics.bmj.com/content/32/1/e101126)
Supplement: inline-supplementary-material-1 [file inline-supplementary-material-1.pdf]

## Peninsula Health Community Advisory Groups and Committees and their roles

| Community Advisory Groups and Committees                                                                             | Role                                                                                                                                                                                                                                                                                                                                                                                                 |
|----------------------------------------------------------------------------------------------------------------------|------------------------------------------------------------------------------------------------------------------------------------------------------------------------------------------------------------------------------------------------------------------------------------------------------------------------------------------------------------------------------------------------------|
| Community Advisory Committee (CAC)                                                                                   | An advisory committee to the Peninsula Health Board of Directors; its primary role being to bring the voice of consumers, carers and the community into strategic decision making within Peninsula Health. Membership includes Consumer Representatives, members of the Board, the Chief Executive Officer and other senior Peninsula Health staff. All Community Advisory Groups report to the CAC. |
| Comprehensive Care Committee                                                                                         | Supports consumers in receiving comprehensive care – that is, coordinated delivery of multidisciplinary healthcare required or requested by the consumer and their support people.                                                                                                                                                                                                                   |
| Digital Health Committee                                                                                             | Advocates the consumer perspective on digitisation and streamlining of Peninsula Health systems to optimise the healthcare experience.                                                                                                                                                                                                                                                               |
| Human Research Ethics Committee                                                                                      | The committee meets monthly on 10 occasions each year to review and monitor research projects to ensure they conform to the requirements of the National Statement on <a href="#">Ethical Conduct in Human Research (2007)</a> .                                                                                                                                                                     |
| Lesbian, Gay, Bisexual, Trans and gender diverse, Intersex, Queer and questioning (LGBTIQ+) Community Advisory Group | Represents various LGBTIQ+ interest groups with persons from different socioeconomic and education levels, varying interests and health status.                                                                                                                                                                                                                                                      |
| Medication Safety Committee                                                                                          | A quality and safety committee which reviews the processes in place to safely prescribe, dispense and administer the right medicines to patients and the processes in place to reduce medication errors.                                                                                                                                                                                             |
| Mental Health Community Advisory Group                                                                               | Represents consumers in the broader community suffering from a mental health condition.                                                                                                                                                                                                                                                                                                              |
| Mount Eliza Personal Alarm Call Service (MEPACS) Community Advisory Group                                            | Advocates the consumer perspective on one of the largest personal alarm services in Australia, MEPACS, which is supported by Peninsula Health.                                                                                                                                                                                                                                                       |
| Multicultural and Deaf Community Advisory Group                                                                      | Represents multicultural and deaf consumers in the broader community.                                                                                                                                                                                                                                                                                                                                |
| Older Persons Community Advisory Group                                                                               | Represents mature adults in the broader community, aged 60 and over.                                                                                                                                                                                                                                                                                                                                 |
| Palliative Care Quality Committee                                                                                    | Advocates the consumer perspective on people living with an advanced and progressive potentially terminal illness.                                                                                                                                                                                                                                                                                   |
| Quality and Governance Committee                                                                                     | Oversees Clinical Governance at Peninsula Health; this is implemented through a framework based on the <a href="#">Victorian Government Clinical Governance Policy Framework</a> which promotes consumer participation, clinical effectiveness, an effective workforce and risk management. Consumers participate in this Committee to provide invaluable input.                                     |
| Renal Community Advisory Group                                                                                       | Represents consumers in the broader community with kidney problems and those receiving treatment and dialysis                                                                                                                                                                                                                                                                                        |
| Serious Incident Review Committee                                                                                    | Reviews all serious incidents that have occurred at Peninsula Health sites and report incidents to the Board Quality and Clinical Governance Committee.                                                                                                                                                                                                                                              |

|                                      |                                                                                                                                           |
|--------------------------------------|-------------------------------------------------------------------------------------------------------------------------------------------|
| Southern Community Advisory Group    | Represents communities living in areas of the Mornington Peninsula bordered by Port Phillip Bay (west side) and Bass Strait (south side). |
| Westernport Community Advisory Group | Represents communities living in areas of the Mornington Peninsula bordered by Western Port Bay (east side).                              |
