# Supplementary material
Source: HighWire-hosted journal article supplement (https://informatics.bmj.com/content/32/1/e101126)
Supplement: inline-supplementary-material-2 [file inline-supplementary-material-2.pdf]

Focus group primary questions and prompts

|                            |                                                                                                                                                                                          |
|----------------------------|------------------------------------------------------------------------------------------------------------------------------------------------------------------------------------------|
| Primary question           | Why would someone be willing to share data?                                                                                                                                              |
| Prompts during discussions | What are the benefits from sharing data?                                                                                                                                                 |
|                            | Who will benefit from sharing data? How will these people benefit from data sharing?                                                                                                     |
|                            | Are benefits predominantly from a research perspective, clinical perspective, or both?                                                                                                   |
|                            | Do you think that population level data is of interest to healthcare consumers? If so, how?                                                                                              |
|                            | Are there any other reasons why people would be willing to provide health data?                                                                                                          |
| Primary question           | Why would someone be hesitant to share data?                                                                                                                                             |
| Prompts during discussions | What are the risks of sharing data?                                                                                                                                                      |
|                            | Who may be disadvantaged from sharing data? How may these people be disadvantaged?                                                                                                       |
|                            | Who should have access to the data that you share?                                                                                                                                       |
|                            | Would you be willing to share data with organisations external to the health network? What organisations would be acceptable? What would need to be considered under such circumstances? |
|                            | Are there any other reasons why people would be hesitant to provide health data?                                                                                                         |
